# Supplementary material
Source: publisher site journal article supplement (https://static.cambridge.org/content/id/urn:cambridge.org:id:article:S0899823X19002988/resource/name/S0899823X19002988supp001.docx)
Supplement: Supplementary file 1 [file S0899823X19002988supp001.docx]

**Respiratory Viruses on Personal Protective Equipment and Bodies of Healthcare Workers**

Linh T. Phan, PhDa

Dagmar Sweeney, MSb

Dayana Maita, MDc

Donna Moritz, MDc

Susan C. Bleasdale, MDc

Rachael M. Jones, PhDa

for the CDC Prevention Epicenters Program

aDivision of Environmental and Occupational Health Sciences, School of Public Health, University of Illinois at Chicago, Chicago, IL, USA

b Sequencing Core, University of Illinois at Chicago, Chicago, IL, USA

c Department of Medicine, College of Medicine, University of Illinois at Chicago, Chicago, IL, USA

Corresponding Author: Rachael M. Jones, School of Medicine, University of Utah, 391 Chipeta Way Suite C, Salt Lake City, UT 84108, 801-585-0451 (phone), 801-581-7224 (fax)

**SUPPLEMENTARY MATERIAL**

**Supplementary Material 1. HEALTHCARE WORKER SAMPLING PROTOCOL**

| **Sampling Surface** | **Sampling Instruction** |
| --- | --- |
| Gloves b | Palm and finger surfaces of HCW’s dominant glove will be swabbed using Copan swab. Swabbing will be performed in two perpendicular directions to ensure the maximum surface area is represented in the sample  Glove area = 153 cm2 |
| Bare hands after care, before hygiene b | Palm and finger surfaces of HCW’s dominant hand will be swabbed using Copan swab. Swabbing will be performed in two perpendicular directions to ensure the maximum surface area is represented in the sample  Hand area = 153 cm2 |
| Mask with eye shield/ Surgical Mask | Use one side of a Copan to swab vertically the entire mask surface, and use the other side of the Copan to swab horizontally the entire mask surface, and use the tip of the swab to swab on the rear of the mask.  Mask with eye shield = 17 x 17 = 289 cm2  Mask without eye shield = 17 x 9 = 153 cm2 |
| Gown | Swab the upper chest and wrist area.  Use one side of the Copan to swab vertically/ horizontally the upper chest area and the other side of the Copan to swab the wrist area.  Swab area = 336 cm2 |
| Personal stethoscope a **(if used)** | Use two side of the Copan to swab the whole stethoscope of the provider  Stethoscope area = 102.67 cm2 |
| Face | 2-cm2 area of each cheek where the edge of the mask/respirator has rested will be swabbed vertically and horizontally by each side of the swab  Total swab area = 4 cm2 |
| Scrub/ lab coat/clothes | Use one side of the Copan to swab vertically/ horizontally the upper chest area  Use the other side of the Copan to swab the sleeve if HCWs wearing long sleeves, and wrist if wearing short sleeve scrubs, respectively.  Swab area = 249 cm2 |

a Surface Area of a Stethoscope is estimated as below: 2 V-shaped cords: 19 cm length and 1 cm diameter (cylinder shape); Black rubber cord: 56 cm length and 3 cm diameter (cylinder shape); Large bell circle shape: 4.5 cm diameter; Small bell circle shape: 2.9 cm diameter; A = 102.67 cm2

b Hand and glove areas are estimated using the average of the 50th percentile anthropometric values of man and woman provided by the National Aeronautics and Space Administration.17
